# Supplementary material
Source: Royal Society of Chemistry journal article supplement (doi:10.1039/d6ta00059b)
Supplement: d6ta00059b1.pdf [file d6ta00059b1.pdf]

## **A systematic review of protective encapsulation for hydrogen storage materials: inorganic barriers and organic matrices**

### **Contents:**

Table S1 Inorganic encapsulation strategies enhance the performance of hydrogen storage composites.

Table S2 Organic polymer encapsulation strategies enhance the performance of hydrogen storage composites.

Table S1 Inorganic encapsulation strategies enhance the performance of hydrogen storage composites.

| Hydrogen storage composites                                     | Synthesis method                          | Air stability                | Hydrogen storage capacity | Hydrogen adsorption and desorption performance                                                                                                                                                                              | Quantitative retention after air exposure | Ref |
|-----------------------------------------------------------------|-------------------------------------------|------------------------------|---------------------------|-----------------------------------------------------------------------------------------------------------------------------------------------------------------------------------------------------------------------------|-------------------------------------------|-----|
| Mg-cGNR                                                         | Chemical reduction                        | 6 months                     | 7.1~7.29 wt.%             | $E_a$ (hydrogenation): 90 kJ·mol <sup>-1</sup><br>$E_a$ (dehydrogenation): 140 kJ·mol <sup>-1</sup>                                                                                                                         | Not mentioned                             | 43  |
| Mg-rGO                                                          | Chemical reduction                        | 3 months                     | 7.56 wt.%                 | $E_a$ (hydrogenation): 60.8 kJ·mol <sup>-1</sup><br>$E_a$ (dehydrogenation): 92.9 kJ·mol <sup>-1</sup>                                                                                                                      | Not mentioned                             | 45  |
| La(Ni <sub>0.95</sub> Fe <sub>0.05</sub> ) <sub>5</sub> -rGO/EC | Ultrasonic dispersion-solvent evaporation | 20 days                      | 1.30 wt.% (by total mass) | $\Delta H$ (hydrogenation): 31.95 kJ·mol <sup>-1</sup><br>$\Delta H$ (dehydrogenation): 35.81 kJ·mol <sup>-1</sup><br>$E_a$ (hydrogenation): 31 kJ·mol <sup>-1</sup><br>$E_a$ (dehydrogenation): 43 kJ·mol <sup>-1</sup>    | Not mentioned                             | 50  |
| MgH <sub>2</sub> -3D activated carbon                           | Chemical reduction                        | 2 weeks                      | 6.63 wt.%                 | $\Delta H$ (hydrogenation): 49.1 kJ·mol <sup>-1</sup><br>$\Delta H$ (dehydrogenation): 46.9 kJ·mol <sup>-1</sup><br>$E_a$ (hydrogenation): 64.1 kJ·mol <sup>-1</sup><br>$E_a$ (dehydrogenation): 107.2 kJ·mol <sup>-1</sup> | Not mentioned                             | 52  |
| Mg-carbon                                                       | Hydrogen plasma metal reaction            | 3 months                     | 6.3 wt.%                  | $E_a$ (hydrogenation): 64.1 kJ·mol <sup>-1</sup><br>$E_a$ (dehydrogenation): 107.2 kJ·mol <sup>-1</sup>                                                                                                                     | Not mentioned                             | 55  |
| Mg <sub>60</sub> Al <sub>40</sub> -graphite                     | Ball milling                              | 2 years<br>(non-inactivated) | 3.67 wt.%                 | $E_a$ (dehydrogenation): 129.7 kJ·mol <sup>-1</sup>                                                                                                                                                                         | Not mentioned                             | 56  |
| MgH <sub>2</sub> -NGNSs                                         | Hydrogenation deposition                  | 3 months                     | 6.5 wt.%                  | Hydrogenation: 6.5 wt.% H <sub>2</sub> (200 °C, 0.4 h)<br>Dehydrogenation: 5.5 wt.% H <sub>2</sub> (300 °C, 0.5 h)                                                                                                          | Capacity loss: 1.0 wt. %                  | 58  |
| NaAlH <sub>4</sub> -GOF                                         | Wet impregnation-thermal hydrogenation    | 7 days                       | 1.01 wt.% (by total mass) | $E_a$ (dehydrogenation): 47.13 kJ·mol <sup>-1</sup> (NaAlH <sub>4</sub> ) and 108.45 kJ·mol <sup>-1</sup> (Na <sub>3</sub> AlH <sub>6</sub> )                                                                               | Capacity loss: 32%                        | 59  |
| Mg <sub>2</sub> NiH <sub>4</sub> -MgO                           | Hydrogen chemical vapor deposition        | Several months               | Not mentioned             | $E_a$ (dehydrogenation): 31.2 kJ·mol <sup>-1</sup>                                                                                                                                                                          | Not mentioned                             | 66  |

|                                    |                          |          |               |                                                                             |                                                                         |    |
|------------------------------------|--------------------------|----------|---------------|-----------------------------------------------------------------------------|-------------------------------------------------------------------------|----|
| MgH <sub>2</sub> -CeO <sub>2</sub> | High-energy ball milling | 168 h    | 5.3 wt.%      | $E_a$ (dehydrogenation): 79 kJ·mol <sup>-1</sup>                            | Capacity: 4.7 wt.%<br>$E_a$ (dehydrogenation): 82 kJ·mol <sup>-1</sup>  | 73 |
| Al-Bi                              | High-energy ball milling | 2 months | Not mentioned | Hydrogen production rate in water: 287 (55 °C) and 713 (70 °C) mL/(min · g) | Not mentioned                                                           | 83 |
| MgH <sub>2</sub> -NbF <sub>5</sub> | Ball milling             | 24 h     | 5.0 wt.%      | $E_a$ (dehydrogenation): 98 kJ·mol <sup>-1</sup>                            | Capacity: 5.0 wt.%<br>$E_a$ (dehydrogenation): 144 kJ·mol <sup>-1</sup> | 88 |

---

Table S2 Organic polymer encapsulation strategies enhance the performance of hydrogen storage composites.

| Hydrogen storage composites                                                                                                                | Synthesis method              | Air stability       | Hydrogen storage capacity                           | Hydrogen adsorption and desorption performance                                                                                                                                   | Quantitative retention after air exposure                                     | Ref |
|--------------------------------------------------------------------------------------------------------------------------------------------|-------------------------------|---------------------|-----------------------------------------------------|----------------------------------------------------------------------------------------------------------------------------------------------------------------------------------|-------------------------------------------------------------------------------|-----|
| Mg(NH <sub>2</sub> ) <sub>2</sub> /2LiH-TPX <sup>TM</sup><br>6Mg(NH <sub>2</sub> ) <sub>2</sub> /9LiH/LiBH <sub>4</sub> -TPX <sup>TM</sup> | Solution casting method       | 12 h                | 4.3 and 4.0 wt. %                                   | Initial dehydrogenation temperature: 140 and 130 °C                                                                                                                              | Capacity loss: 0.021 wt. % per cycle and Capacity: 3.0 wt. %<br>Not mentioned | 94  |
| Mg-PE                                                                                                                                      | Chemical reduction            | 3 months            | 3.94 wt. %                                          | Not mentioned                                                                                                                                                                    | Not mentioned                                                                 | 113 |
| NaBH <sub>4</sub> -PS                                                                                                                      | Co-precipitation              | 3 h                 | Not mentioned                                       | Not mentioned                                                                                                                                                                    | Weight gain: 30%                                                              | 117 |
| MgH <sub>2</sub> -PS                                                                                                                       | Organometallic hydrogenolysis | 24 h                | 5.8 wt. %                                           | <i>E<sub>a</sub></i> (dehydrogenation): 171.3 kJ·mol <sup>-1</sup>                                                                                                               | Capacity loss: 30%                                                            | 119 |
| LaNi <sub>5</sub> -AES                                                                                                                     | Ball milling                  | 17 h                | 0.5 wt. % (by total mass)                           | Not mentioned                                                                                                                                                                    | Kinetic rate decline: 2.5 times                                               | 123 |
| NaBH <sub>4</sub> -PABA/PEIm                                                                                                               | Layer-by-layer assembly       | 24 h                | Not mentioned                                       | Not mentioned                                                                                                                                                                    | Weight gain: < 25%                                                            | 129 |
| Mg-PMMA                                                                                                                                    | One-pot reduction method      | 2 weeks             | 5.97 wt. %                                          | <i>E<sub>a</sub></i> (hydrogenation): 24.5 kJ·mol <sup>-1</sup><br><i>E<sub>a</sub></i> (dehydrogenation): 79.5 kJ·mol <sup>-1</sup>                                             | Not mentioned                                                                 | 46  |
| LaNi <sub>5</sub> -PMMA, TiMn <sub>2</sub> -PMMA,<br>Mg <sub>2</sub> Ni-PMMA                                                               | Solution impregnation         | 168 h               | 1.30 wt. %, 1.23 wt. %, 2.85 wt. % (after exposure) | Dynamic performance slightly decreased after packaging.                                                                                                                          | Weight gain: 0.03 wt. %, ~0.00 wt. %, 0.16 wt. %                              | 133 |
| Mg-PMMA                                                                                                                                    | Chemical reduction            | 3 months            | 6.94 wt. %                                          | Not mentioned                                                                                                                                                                    | Not mentioned                                                                 | 113 |
| Mg-MWCNT/PMMA,<br>Mg-PMMA                                                                                                                  | Chemical reduction            | 10 days,<br>30 days | 6.7 wt. %, 5.25 wt. %                               | Hydrogenation: 6.7 wt. % H <sub>2</sub> (200 °C, 20 bar)<br>Dehydrogenation: 5.5 wt. % H <sub>2</sub> (150 °C, 0 bar),<br>Initial (de)hydrogenation temperatures: 150 and 140 °C | Not mentioned                                                                 | 134 |

|                                                             |                            |        |                       |                                                                                                                         |               |                     |
|-------------------------------------------------------------|----------------------------|--------|-----------------------|-------------------------------------------------------------------------------------------------------------------------|---------------|---------------------|
| NaAlH <sub>4</sub> -PEIS,<br>NaAlH <sub>4</sub> -PEIS/MWCNT | Solution precipitation     | 24 h   | 1.1 wt.%,<br>1.2 wt.% | Initial dehydrogenation temperatures: 182, 185 °C<br>Hydrogenation: 1.1, 1.2 wt.% H <sub>2</sub> (120 °C, 32 bar, 12 h) | Not mentioned | <a href="#">32</a>  |
| NaAlH <sub>4</sub> -PANI/TiO <sub>2</sub>                   | Spray drying               | 24 h   | 0.95 wt.%             | Initial dehydrogenation temperatures: 180 °C<br>Hydrogenation: 0.95 wt.% H <sub>2</sub> (120 °C, 32 bar, 12 h)          | Not mentioned | <a href="#">32</a>  |
| Mg-PPy                                                      | Electrochemical deposition | 1 week | Not mentioned         | Initial dehydrogenation temperatures: 125 °C                                                                            | Not mentioned | <a href="#">145</a> |

---
